# Supplementary material for: CD8+ T Cells Responding to the Middle East Respiratory Syndrome Coronavirus Nucleocapsid Protein Delivered by Vaccinia Virus MVA in Mice
Source: PubMed Central journal article supplement (PMC6316859; doi:10.3390/v10120718), 2018-12-16
Supplement: viruses-10-00718-s001.pdf [file viruses-10-00718-s001.pdf]

Supplementary Materials:

**Table S1.** The design of matrix peptide pools for systematically screening of H2-d restricted T cell epitopes in MERS-CoV N protein.

| Matrix | Pool | Peptide |    |    |    |    |    |       |       |         |  |
|--------|------|---------|----|----|----|----|----|-------|-------|---------|--|
| 1      | H1   | 2       | 3  | 4  | 6  | 7  | 8  | 9     | 10    | 11      |  |
|        | H2   | 12      | 13 | 14 | 15 | 16 | 17 | 18    | 19    | 22      |  |
|        | H3   | 23      | 24 | 25 | 26 | 27 | 28 | 29    | 30    | 31      |  |
|        | H4   | 32      | 33 | 34 | 35 | 36 | 37 | 38    | 39    | 49      |  |
|        | H5   | 50      | 51 | 52 | 53 | 54 | 55 | 56    | 57    | 58      |  |
|        | H6   | 59      | 60 | 65 | 66 | 67 | 68 | 69    | 70    | 71      |  |
|        | H7   | 72      | 73 | 74 | 75 | 76 | 77 | 78/79 | 80    | 81      |  |
|        | H8   | 82      | 83 | 84 | 85 | 86 | 87 | 88    | 89/90 | 91      |  |
|        | H9   | 92      | 93 | 94 | 95 | 96 | 97 | 98    | 99    | 100/101 |  |
| 2      | V1   | 2       | 12 | 23 | 32 | 50 | 59 | 72    | 82    | 92      |  |
|        | V2   | 3       | 13 | 24 | 33 | 51 | 60 | 73    | 83    | 93      |  |
|        | V3   | 4       | 14 | 25 | 34 | 52 | 65 | 74    | 84    | 94      |  |
|        | V4   | 6       | 15 | 26 | 35 | 53 | 66 | 75    | 85    | 95      |  |
|        | V5   | 7       | 16 | 27 | 36 | 54 | 67 | 76    | 86    | 96      |  |
|        | V6   | 8       | 17 | 28 | 37 | 55 | 68 | 77    | 87    | 97      |  |
|        | V7   | 9       | 18 | 29 | 38 | 56 | 69 | 78/79 | 88    | 98      |  |
|        | V8   | 10      | 19 | 30 | 39 | 57 | 70 | 80    | 89/90 | 99      |  |
|        | V9   | 11      | 22 | 31 | 49 | 58 | 71 | 81    | 91    | 100/101 |  |

**1**    **MASPAAPRAVSFADNNDITNTNLSRGRGRNPKPRAAPNNTVSWYTGLTQH**  
**51**    **GKVPLTFPPGQGVPLNANSTPAQNAGYWRRQDRKINTGNGIKQLAPRWYF**  
**101**    **YYTGTGPEAALPFAVKDGIWVHEDGATDAPSTFGTRPNND SAIVTQF**  
**151**    **APGTKLPKNFHIEG**TGGSQSSSRASSLSRNSSRSSSQSRSGNSTRGTS  
**201**    **PGPSGIGAVGGDLLYLDLLNRLQALESGKVKQSQPKVI**TKKDAAAANKM  
**251**    **RHKRTSTKSFNMVQAFGLRGPGLQGNFGDLQLNKLGTEDPRWPQIAELA**  
**301**    **PTASAFMGMSQFKLTHQNDDHGNPVYFLRYSGAIKLDPKNPNYNKWLEL**  
**351**    LEQNIDAYKTFPKKEKKQKAPKEESTDQMSEPPKEQRVQGSITQRTRTRP  
**401**    **SVQPGPMIDVNTD**

**Figure S1.** Sequence analysis and modular organization of MERS-CoV N protein. The primary amino acid sequence of MERS-CoV N protein (MERS-CoV strain EMC/2012, GenBank accession no. JX869059). The N-terminal and C-terminal domain are indicated in red and green, respectively. Predicted RNA-binding domains (aa 37-164 and aa 239-362) are highlighted in gray. The structurally flexible linker region is indicated in black containing several Ser/Arg (SR) motifs, which are underlined in black [64]. H2-d restricted peptides with CD4+ (N<sub>350-362</sub>, [57]) and CD8+ (N<sub>358-367</sub>) T cell antigenicity are underlined in orange and blue, respectively.

**Table S2.** Comparative analysis of MERS-CoV N<sub>358-367</sub> epitope in different MERS-CoV strains (modified from [65]).

| Lineage   | Strain                         | N <sub>358-367</sub> |
|-----------|--------------------------------|----------------------|
| Lineage 1 | England-Qatar/2012             | YKTFPKKEKK           |
| Lineage 2 | Abu Dhabi_UAE_8_2014           | YKTFPKKEKK           |
| Lineage 3 | Riyadh_2014KSA_683/KSA/2014    | YKTFPKKEKK           |
| Lineage 4 | Jeddah_c7770/KSA/2914-04-07    | YKTFPKKEKK           |
| Lineage 5 | MERS-CoV/KOR/KNIH/0001_05_2015 | YKTFPKKEKK           |
| Outgroup  | MERS-CoV EMC/2012              | YKTFPKKEKK           |

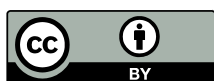

© 2018 by the authors. Submitted for possible open access publication under the terms and conditions of the Creative Commons Attribution (CC BY) license (<http://creativecommons.org/licenses/by/4.0/>).
